# Supplementary figures and images for: Efficacy of botulinum toxin type a in the targeted treatment of sleep bruxism: a double-blind, randomised, placebo-controlled, cross-over study
Source: HighWire-hosted journal article supplement (doi:10.1136/bmjno-2022-000328), 2022-09-01

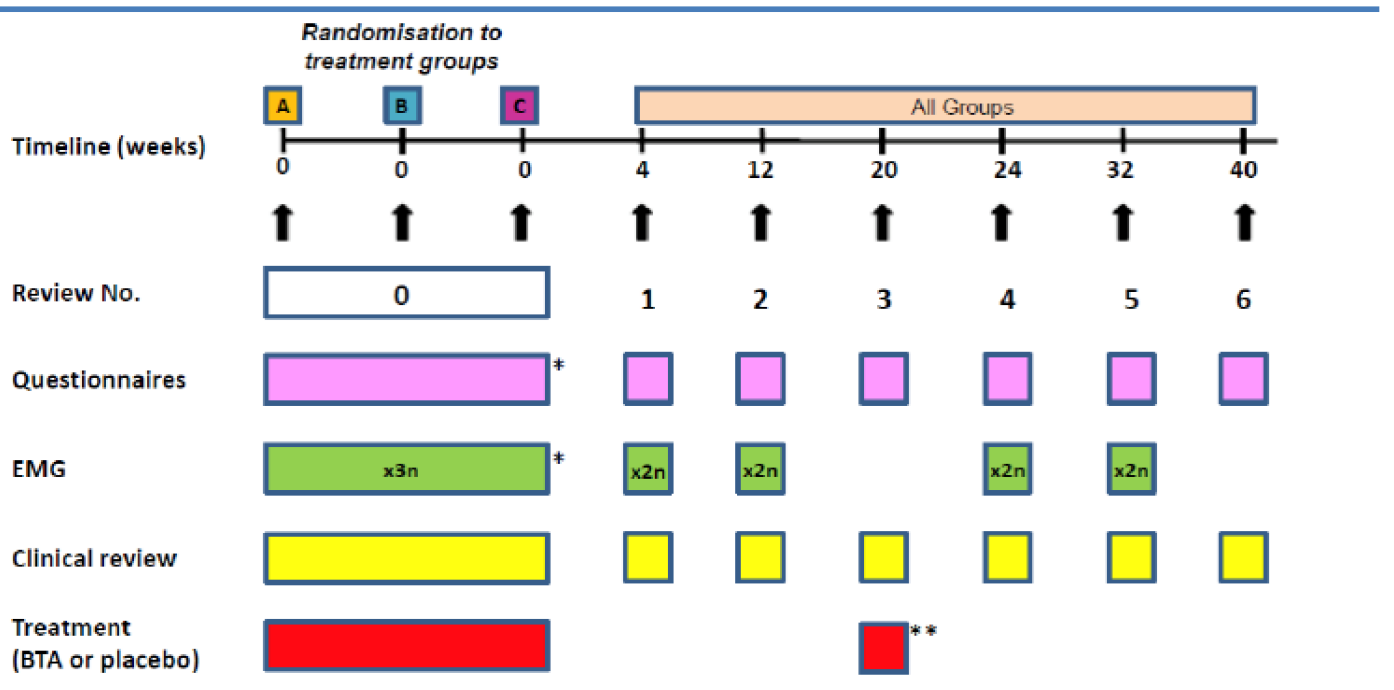

Supplement: bmjno-2022-000328supp001_data_supplement.pdf [file bmjno-2022-000328supp001_data_supplement.pdf]
